# Supplementary material for: Aqueous solution synthesis of SnO nanostructures with tuned optical absorption behavior and photoelectrochemical properties through morphological evolution
Source: Royal Society of Chemistry journal article supplement (doi:10.1039/c0nr00370k), 2010-01-01
Supplement: c0nr00370k.pdf [file c0nr00370k.pdf]

## Electronic Supplementary Information

### Aqueous Solution Synthesis of SnO Nanostructures with Tuned Optical Absorption and Photoelectrochemical Properties through Morphological Evolution

Ken Sakaushi,<sup>a</sup> Yuya Oaki,<sup>a</sup> Hiroaki Uchiyama,<sup>a</sup> Eiji Hosono,<sup>b</sup> Haoshen Zhou,<sup>b</sup> Hiroaki Imai<sup>\*a</sup>

<sup>a</sup>Department of Applied Chemistry, Faculty of Science and Technology, Keio University, 3-14-1 Hiyoshi, Kohoku-ku, Yokohama 223-8522, Japan

<sup>b</sup>Energy Technology Research Institute, National Institute of Advanced Industrial Science and Technology, 1-1-1 Umezono, Tsukuba 305-8568, Japan

#### Contents

|                                                                    |          |
|--------------------------------------------------------------------|----------|
| FT-IR and TG analysis of organic residue on the SnO nanostructures | ...P. S1 |
| XRD patterns of the pellet consisting of the SnO nanosheets        | ...P. S2 |

## FT-IR and TG analysis of organic residue on the SnO nanostructures

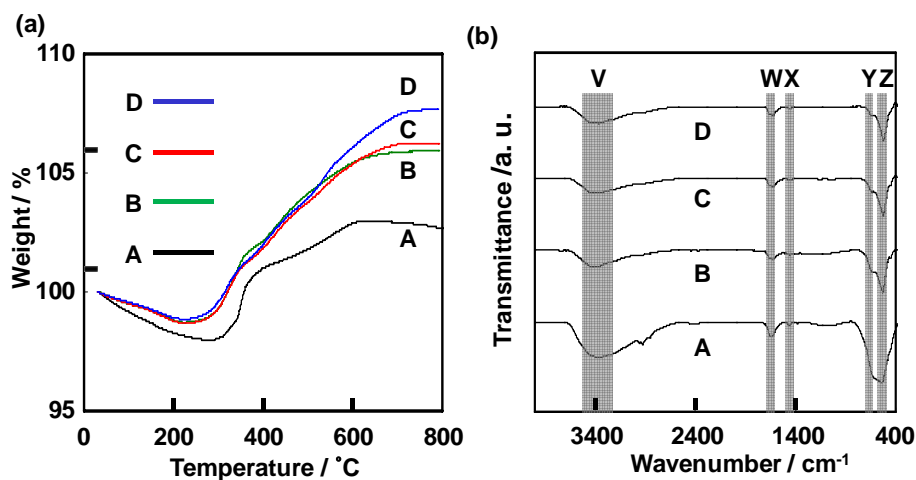

**Figure S1.** TG curves (a) and FT-IR spectra (b) of the SnO nanostructures including sheets (A), ribbons (B), and their composite structures (C,D).

The TG analyses were performed in air. Thus, the oxidation from SnO to SnO<sub>2</sub> proceeds in air. In the TG curves, the weight losses up to 300 °C was caused by the residual water molecule and the weight increase around 400 °C results from the oxidation of SnO to SnO<sub>2</sub>. Based on the calculation, the oxidation of SnO leads to ca. 12 wt. % of weight increase to form SnO<sub>2</sub> crystals. In contrast, our samples show the weight increase ca. 5 wt. %. The results indicate that the residual water molecules and organic compounds contain in the resultant SnO nanostructures.

FT-IR spectrum of the SnO nanostructures was measured by KBr method. Each absorption band can be assigned as follows. The absorption bands designated by V and W are assigned to the O–H stretching and bending vibrations of water molecules absorbed on the SnO nanostructures, respectively. The weak absorption band designated by X can be attributed to N–H bending vibration ammonium ions (NH<sub>4</sub><sup>+</sup>) or/and symmetric C–O stretching vibration of carbonate ions (CO<sub>3</sub><sup>-</sup>). The absorption bands Y and Z can be attributed to stretching vibrations of Sn–O in the SnO nanostructures.<sup>[S1]</sup> However, we could not definitely identify these peaks to the specific organic components.

### Reference

S1. D. Amalric-Popescu and F. Bozon-Verduraz, *Catalysis Today* **70** (2001), 139.

### XRD patterns of the pellet consisting of the SnO nanosheets

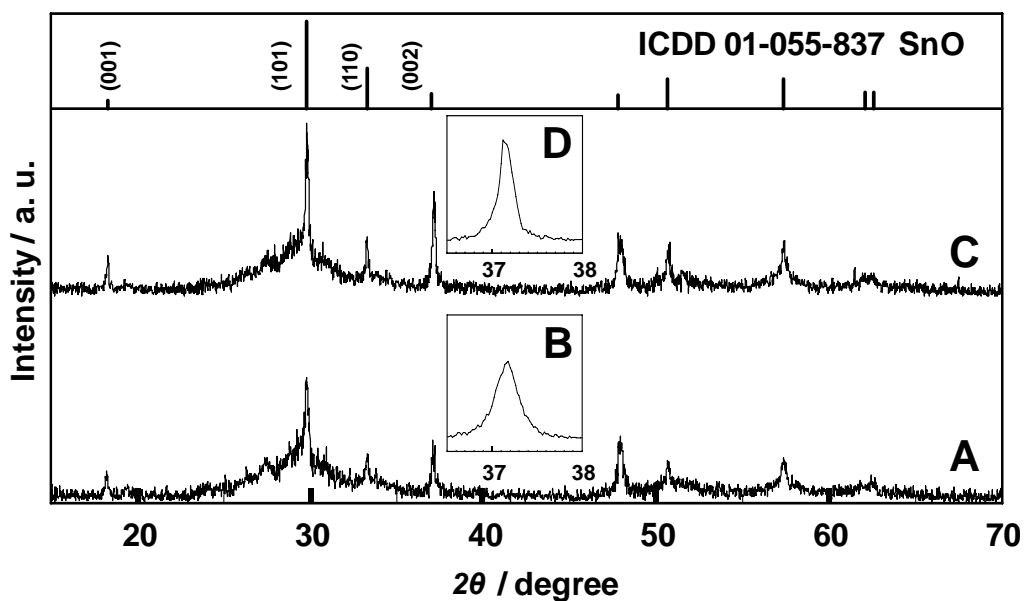

**Figure S2.** XRD patterns of the pellet consisting of the SnO nanosheets (A, B) and the sintered sample (C, D).

All the XRD patterns of the pellets agree with tetragonal SnO (A, C). The SnO crystals in the pellets were not oxidized after the sintering at 400 °C in argon atmosphere. The sharpened peaks of the (002) planes indicate the grain growth (profiles B and D). The half width of the (002) planes was sharpened from  $2\theta=0.295$  degree to  $2\theta=0.180$  degree with the sintering.
